# Supplementary material
Source: publisher figshare collection journal article supplement (https://gsajournals.figshare.com/ndownloader/files/36174936)
Supplement: Supplementary file 1 [file 36174936]

chr	pos	id	A1	A2	beta	sd	p
1	167889750	AX-103547138	T	C	-0.249065284	0.042650531	5.23E-09
1	16979620	AX-104748629	G	A	-0.316975693	0.054973415	8.12E-09
1	152659086	AX-103630812	A	G	-0.242936541	0.043579169	2.48E-08
1	172709687	AX-104235517	A	G	-0.249483377	0.044840539	2.64E-08
1	165399279	AX-104604901	A	C	-0.272489122	0.049214217	3.08E-08
1	120389182	AX-104451074	G	A	-0.31489773	0.057218461	3.72E-08
1	181251053	AX-104677493	T	C	-0.323984481	0.059209356	4.45E-08
1	161411374	AX-104491414	G	A	-0.218298574	0.040409378	6.58E-08
2	85873720	AX-103699457	G	A	-0.290545304	0.040310163	5.69E-13
2	92260610	AX-103002406	T	C	-0.291958648	0.049017296	2.58E-09
2	95726382	AX-104320990	A	C	-0.263025991	0.045764784	9.07E-09
2	83316550	AX-104692295	A	G	-0.41058051	0.073577543	2.40E-08
2	113433033	AX-103893985	A	G	-0.371034463	0.06780953	4.46E-08
2	103773160	AX-104431036	A	G	-0.331415778	0.060603991	4.54E-08
2	113793329	AX-103659774	A	G	-0.427812214	0.07980796	8.30E-08
4	29201049	AX-103408616	T	C	-0.334206572	0.049350861	1.27E-11
4	85780520	AX-103300903	A	G	-0.248454373	0.041603425	2.34E-09
5	60855540	AX-104110533	C	T	-0.268382678	0.04950522	5.92E-08
5	21231893	AX-103725818	G	T	-0.261532685	0.049248012	1.09E-07
6	33050364	AX-103882442	A	G	-0.299677226	0.050360025	2.67E-09
6	77717350	AX-103066246	A	G	-0.341481863	0.060325154	1.51E-08
8	35272427	AX-103034987	G	A	-0.405478786	0.065595776	6.35E-10
8	31344118	AX-103034987	A	C	-0.274974424	0.048536586	1.47E-08
8	96476384	AX-104199183	C	T	-0.30084071	0.055258717	5.20E-08
8	32610990	AX-104347703	C	T	-0.286798559	0.053834526	9.96E-08
8	57317599	AX-103515832	C	T	-0.251318399	0.047236761	1.04E-07
9	72122737	AX-104436463	T	C	-0.322084463	0.05580119	7.83E-09
10	84997106	AX-104709897	T	C	-0.486555385	0.082318996	3.41E-09
10	69894473	AX-103246791	C	A	-0.247963194	0.045236561	4.22E-08
13	16237653	AX-103589520	C	T	-0.340719622	0.057723884	3.58E-09
15	55512469	AX-104783020	C	T	-0.27390698	0.045414476	1.63E-09
15	74044214	AX-104635125	G	A	-0.292711534	0.049578865	3.55E-09
16	30408620	AX-104459223	G	A	-0.303471683	0.052945219	9.94E-09
16	68091834	AX-104456931	G	A	-0.215879742	0.038413811	1.91E-08
17	77491730	AX-103225801	A	G	-0.333852847	0.056092568	2.65E-09
17	6212612	AX-104354123	G	A	-0.222919495	0.039649384	1.88E-08
17	40253974	AX-103392775	T	C	-0.275801181	0.051075592	6.67E-08
18	27056892	AX-104005162	C	T	-0.2027925	0.037818717	8.22E-08
19	61510513	AX-104918623	C	T	-0.227849737	0.038958687	4.96E-09
20	61064890	AX-104001545	T	C	-0.385679217	0.071708086	7.51E-08
22	33468031	AX-104343963	T	C	-0.244583857	0.043476226	1.85E-08
24	22791028	AX-104481324	T	G	-0.366752822	0.056197496	6.75E-11
24	46690329	AX-103854327	A	G	-0.422306868	0.070620579	2.23E-09
27	1613634	AX-103888186	T	C	-0.399573186	0.061250679	6.87E-11
27	18207816	AX-103906689	G	T	-0.314895172	0.058746291	8.31E-08
27	10846899	AX-104786696	G	T	-0.249850892	0.046848583	9.65E-08
29	17669169	AX-103510367	G	T	-0.296408103	0.053017183	2.26E-08
30	4279845	AX-103024072	G	T	-0.280047269	0.044798636	4.07E-10
31	14453924	AX-104308779	G	A	-0.342587797	0.059205791	7.19E-09
31	24992307	AX-103068791	C	T	-0.239831142	0.043766973	4.26E-08
31	6076336	AX-103036854	C	T	-0.217660543	0.040871576	1.01E-07
